## Serotonin-induced high intracellular pH aids in alkali secretion in the anterior midgut of larval yellow fever mosquito *Aedes aegypti* L.

Horst Onken<sup>1,2,\*</sup>, Scott K. Parks<sup>3</sup>, Greg G. Goss<sup>3</sup> and David F. Moffett<sup>2</sup>

<sup>1</sup>Department of Biological Sciences, Wagner College, Staten Island, NY 10301, USA, <sup>2</sup>School of Biological Sciences, Washington State University, Pullman, WA 99164, USA and <sup>3</sup>Department of Biological Sciences, University of Alberta, Edmonton, Alberta, Canada, T6G 2E9

\*Author for correspondence (e-mail: horst.onken@wagner.edu)

Accepted 21 May 2009

### SUMMARY

The anterior midgut of the larval yellow fever mosquito *Aedes aegypti* generates a luminal pH in excess of 10 *in vivo* and similar values are attained by isolated and perfused anterior midgut segments after stimulation with submicromolar serotonin. In the present study we investigated the mechanisms of strong luminal alkalinization using the intracellular fluorescent indicator BCECF-AM. Following stimulation with serotonin, we observed that intracellular pH ( $pH_i$ ) of the anterior midgut increased from a mean of 6.89 to a mean of 7.62, whereas  $pH_i$  of the posterior midgut did not change in response to serotonin. Moreover, a further increase of  $pH_i$  to 8.58 occurred when the pH of the luminal perfusate was raised to an *in vivo*-like value of 10.0. Luminal  $Zn^{2+}$  ( $10\ \mu\text{mol l}^{-1}$ ), an inhibitor of conductive proton pathways, did not inhibit the increase in  $pH_i$ , the transepithelial voltage, or the capacity of the isolated tissue to alkalinize the lumen. Finally, the transapical voltage did not significantly respond to luminal pH changes induced either by perfusion with pH 10 or by stopping the luminal perfusion with unbuffered solution which results in spontaneous luminal alkalinization. Together, these results seem to rule out the involvement of conductive pathways for proton absorption across the apical membrane and suggest that a serotonin-induced alkaline  $pH_i$  plays an important role in the generation of an alkaline lumen.

Key words: BCECF, intracellular pH, membrane voltage, microelectrodes, transepithelial voltage, serotonin, zinc.

### INTRODUCTION

The anterior midgut (anterior stomach) of the larval mosquito is responsible for generating a luminal pH ( $pH_L$ ) that may be greater than 10, as first demonstrated in intact animals by colorimetric methods using ingested pH indicator (Dadd, 1975) and later confirmed by  $H^+$ -sensitive microelectrode studies (Onken et al., 2008). The mechanisms of base secretion and/or acid absorption involved have been studied with intact larvae, with semi-intact preparations (Boudko et al., 2001a; Boudko et al., 2001b) and with fully isolated, perfused gut segments (Onken et al., 2008). Immunohistochemical observations (Zhuang et al., 1999) as well as the results of studies with intact and semi-intact larvae have led to the general hypothesis that alkali secretion is energized by a basolateral V-type proton ATPase (Boudko et al., 2001b), in combination with an apical  $Cl^-/HCO_3^-$  exchanger (Boudko et al., 2001a). A challenge for the second part of the hypothesis is presented by the fact that direct  $HCO_3^-$  secretion alone can generate only a moderately alkaline pH of about 8.5. Therefore, attaining  $pH_L$  values  $>10$  as reported for the larval mosquito midgut would be impossible by a simple exchange of  $Cl^-$  for  $HCO_3^-$ . Consequently, it was hypothesized that achieving these high  $pH_L$  values would require a secondary uptake of  $H^+$  from the lumen following  $HCO_3^-$  secretion. Another alternative that is as yet unexplored is the possibility that direct secretion of  $CO_3^{2-}$  *per se* could also accomplish a high  $pH_L$ . However, this possibility has always been considered unlikely because of the very low amounts of  $CO_3^{2-}$  present at normal intracellular pH ( $pH_i$ ) values

In isolated and perfused midgut preparations, the transepithelial potential ( $V_{te}$ ) declines to a small, usually lumen-negative value

within minutes of the onset of perfusion with control saline (Clark et al., 1999; Clark et al., 2000). Luminal alkalinization under these conditions is very slow and hardly detectable (Onken et al., 2008). Application of submicromolar serotonin causes a sustained increase in the  $V_{te}$  to values of the order of 10–40 mV lumen negative. This response is maximal in about 20 min and is accompanied by a significant stimulation of luminal alkalinization, as measured in stop-flow experiments using pH indicator dye or  $H^+$ -selective microelectrodes (Onken et al., 2008). Both the electrical and chemical responses are reversible on washout of serotonin. It is probable that serotonin is the major natural endogenous excitatory stimulus for epithelial transport and motility in the midgut, and the gut indeed receives a rich serotonergic innervation (Moffett and Moffett, 2005). On the other hand, roles for other substances, either as intermediaries or modulators, are also likely as the gut also has a substantial population of enteroendocrine cells, and modulatory effects of some neuropeptides have been reported (Onken et al., 2004).

The present studies were performed to determine the consequences of stimulation of alkali secretion on the  $pH_i$  and to evaluate the possibility of passive, conductive uptake of  $H^+$  across the apical membrane as part of this process.

### MATERIALS AND METHODS

#### Animals

For the optical experiments, eggs of *Aedes aegypti* were obtained from Dr Carl Lowenberger (Simon Fraser University, Burnaby, BC, Canada) and reared in covered plastic dishes in a temperature-

controlled chamber at 27°C. The water was a 50:50 mixture of deionized water and City of Edmonton (Alberta, Canada) tap water. Larvae were fed daily with ground Tetramin (Tetra Werke, Melle, Germany). For non-optical experiments, eggs of the Vero Beach strain were provided by Dr Marc Klowden (University of Idaho, Moscow, ID, USA) and reared under similar conditions. Larvae that were in day 1 or day 2 of the 4th instar were chosen for experiments. Isolation, mounting and perfusion of larval midguts were accomplished using previously described techniques (Onken et al., 2004; Onken et al., 2008) and resulted in removal of the peritrophic membrane from the preparation.

#### Solutions and drugs

The hemolymph side of the tissue was gravity superfused ( $0.5 \text{ ml min}^{-1}$ ) with oxygenated saline with a composition based on larval *Aedes* hemolymph (Edwards, 1982a; Edwards, 1982b); in  $\text{mmol l}^{-1}$ : NaCl, 42.5; KCl, 3.0;  $\text{MgCl}_2$ , 0.6;  $\text{CaCl}_2$ , 5.0;  $\text{NaHCO}_3$ , 5.0; succinic acid, 5.0; malic acid, 5.0; L-proline, 5.0; L-glutamine, 9.1; L-histidine, 8.7; L-arginine, 3.3; dextrose, 10.0; HEPES, 25. The pH was adjusted to 7.0 with NaOH. The gut lumen was perfused with NaCl ( $100 \text{ mmol l}^{-1}$ ) at a rate of  $50\text{--}150 \mu\text{l h}^{-1}$ , using one or more Aladdin syringe pumps (World Precision Instruments, Sarasota, FL, USA). The components of the above solutions were purchased from Sigma (St Louis, MO, USA), Fisher Scientific (Pittsburgh, PA, USA) or Mallinckrodt (Hazelwood, MO, USA). Serotonin (Sigma) and  $\text{ZnCl}_2$  (Baker Chemical, Phillipsburg, NJ, USA) were directly dissolved in the saline.

#### Fluorescence microscopy for measurement of $\text{pH}_i$

$\text{pH}_i$  measurements were obtained following the protocol described previously (Parks et al., 2007). Briefly, the perfusion chamber was mounted on the stage of a Nikon Eclipse TM-300 inverted microscope and midguts were subjected to differential interference contrast microscopy for initial focusing and for photographic records of the appearance of the mounted tissue. The microscope was illuminated with a xenon arc lamp (Lambda LS; Sutter Instruments, Novato, CA, USA) and a TM-FM epifluorescence attachment was used for fluorescence imaging. The BCECF trapped in the tissue (see below) was excited at its absorption peak of 495 nm; 440 nm was used as an isobestic wavelength. At 10 s intervals, images at these wavelengths were captured digitally on a mono 12-bit charge-coupled device camera (Retiga EXi, Burnaby, BC, Canada). Northern Eclipse version 6 software (Mississauga, ON, Canada) was used to compile the 495 to 440 nm ratios as an indication of the  $\text{pH}_i$ .

After the tissue was attached to the perfusion pipette, it was loaded with the pH-sensitive intracellular dye BCECF-AM (Invitrogen, Carlsbad, CA, USA), as follows:  $2 \mu\text{l}$  of a  $5 \text{ mmol l}^{-1}$  solution of BCECF-AM dissolved in DMSO containing 20% pluronic acid was added to the chamber volume of  $450 \mu\text{l}$  of standard saline to achieve a final BCECF-AM concentration of  $0.5 \mu\text{mol l}^{-1}$ . After 30 min of incubation in the dye solution, perfusion and superfusion were started, washing away all dye not taken up by the tissue. In three control experiments, 30 min exposure to the BCECF-DMSO-pluronic acid mixture with which the tissue was dye-loaded was found to have no measurable effect on the transepithelial potential of unstimulated tissues, nor did it affect the electrical response to serotonin or the ability of tissues to secrete alkali in response to serotonin.

At the beginning of each experiment, three to eight areas of interest were established on the CCD image of the gut. Fig. 1 shows an example of such areas in a typical experiment. Data presented represent the average of fluorescence collected from these areas,

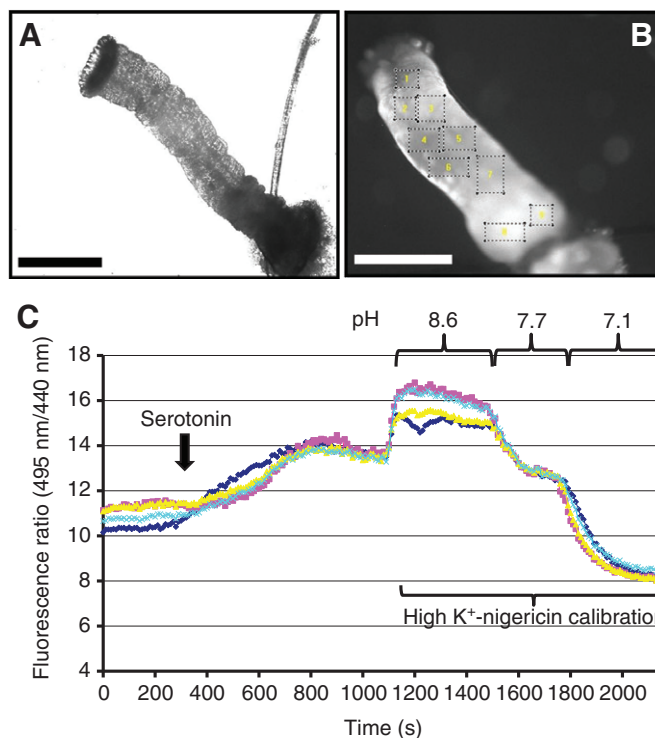

Fig. 1. Experimental set-up for intracellular pH ( $\text{pH}_i$ ) monitoring of regions in the midgut of larval (4th instar) *Aedes aegypti*. (A) DIC image of the midgut preparation as observed on the experimental apparatus (scale bar  $200 \mu\text{m}$ ). (B) Corresponding fluorescence image ( $F_{495}$ ) of the same midgut from A following loading of the pH-sensitive dye BCECF-AM. Dotted boxes represent regions of interest that were used to observe ratiometric fluorescence changes (scale bar,  $200 \mu\text{m}$ ). (C) Representative traces of four regions of interest in the midgut and their corresponding fluorescence ratios ( $F_{495}/F_{440}$ ) generated from excitation of cells loaded with BCECF-AM. This graph demonstrates the ability to convert observed changes in fluorescence ratios to  $\text{pH}_i$  values by using the high  $\text{K}^+$ -nigericin calibration for each individual cell.

each of which is estimated to correspond to approximately three to seven of the large differentiated epithelial cells together with perhaps twice this number of the much smaller regenerative and epithelioendocrine cells.

At the end of each experiment, fluorescence ratios recorded during the experiment were calibrated by superfusing the tissue successively with high- $\text{K}^+$  solutions (in  $\text{mmol l}^{-1}$ : 75 potassium gluconate, 20 KCl, 2  $\text{MgCl}_2$ , 20 HEPES) containing  $5 \mu\text{mol l}^{-1}$  nigericin, adjusted to cover the range of pH values 6.6–8.4 (see Fig. 1). The values obtained at each calibration set point were then used to generate a regression equation for each of the designated areas of interest. This equation was then applied to the ratiometric data obtained over the course of the whole experiment, resulting in an internally calibrated  $\text{pH}_i$  trace that represents an average value for the several cells within that area. In several initial studies, the  $\times 40$  objective of the microscope was used and individual cells were outlined as areas of interest. These studies failed to indicate heterogeneity among the large principal cells in either initial  $\text{pH}_i$  or response to serotonin.

#### Measurements of $V_{te}$ , cellular membrane potentials and luminal alkalinization

In the optical experiments it was not practical to make simultaneous measurements of tissue electrical parameters. Therefore, parallel

experiments were conducted to determine the effects of  $Zn^{2+}$  on  $V_{te}$  and luminal alkalinization, and to measure changes in transbasal potential ( $V_{bi}$ ) and transapical potential ( $V_{api}$ ) during luminal alkalinization. Mounting and perfusion of isolated anterior midguts, the measurement of  $V_{te}$  and luminal alkalinization, and the measurement of membrane voltages were conducted as described in detail previously (Clark et al., 2000; Onken et al., 2008). Briefly, for these experiments the luminal perfusate contained *m*-Cresol Purple (0.04% w/v) for evaluation of luminal alkalinization. Luminal perfusion was interrupted and a color change from orange to purple ( $pK_2=8.32$ ) [see Fig. 1 of Onken et al. (Onken et al., 2008)] was taken to indicate luminal alkalinization. These evaluations were observed using a dissecting microscope and recorded using a digital camera (Power-Shot S40, Canon USA, Lake Success, NY, USA).  $V_{te}$  was measured with a voltage clamp (VCC 600, Physiologic Instruments, San Diego, CA, USA) and calomel electrodes connected to the bath and perfusate with agar bridges (3% agar in  $3\text{ mol l}^{-1}$  KCl). For the measurement of membrane potentials glass microelectrodes were pulled (model 700B, David Kopf Instruments, Tujunga, CA, USA) from 1.5 mm o.d. microfilament capillaries (Omega-Dot 30-32-1, Frederick Haer, Brunswick, ME, USA) to tip resistances of 30–50 M $\Omega$  and filled with  $3\text{ }\mu\text{mol l}^{-1}$  KCl. Microelectrodes were advanced under visual control using a hydraulic drive (Mechanical Developments, South Gate, CA, USA) for the final approach to the cells.  $V_{bi}$  values were measured using an electrometer (A-M Systems model 1600, Carlsborg, WA, USA). From  $V_{te}$  and  $V_{bi}$  the corresponding  $V_{api}$  values were calculated. Data were digitized using a Labtrax 4 AD converter and analyzed using Data-Trax software (World Precision Instruments).

#### Analysis and statistics

Data from the optical experiments were transferred to a Microsoft Excel spreadsheet, where fluorescence ratios were converted to  $pH_i$  values by reference to linear fits of the corresponding calibration points.  $pH_i$  (or  $\Delta pH_i$ ) for the different regions of interest was then pooled (averaged) for each isolated midgut preparation. In Results, the means  $\pm$  s.e.m. of the independent preparations are given. Indicated *N* values refer to the number of different preparations used. Differences between groups were tested with the pooled results from different preparations. Student's paired *t*-test was used when comparing results obtained with each of the individual tissues, whereas Student's unpaired *t*-test was used when results from different groups of preparations were compared. Significance was assumed at  $P < 0.05$ .

For the non-optical experiments, voltage values were extracted from the digitized voltage traces and transferred to a spreadsheet for statistical analysis. The results of multiple impalements on one isolated midgut were pooled before further analysis. Results are presented as means  $\pm$  s.e.m. Indicated *N* values refer to the number of independent experiments with different preparations. Differences between groups were tested with Student's paired *t*-test, using the pooled data from different midgut preparations. Significance was assumed at  $P < 0.05$ .

## RESULTS

### $pH_i$ of anterior and posterior midgut cells under baseline conditions, and the effect of serotonin

In these experiments, the hemolymph side of the tissue was superfused with standard mosquito saline while the lumen was perfused with unbuffered  $100\text{ mmol l}^{-1}$  NaCl adjusted to pH 7.0. In 71 regions of 10 anterior stomach preparations the average  $pH_i$  was found to be  $6.89 \pm 0.15$  ( $N=10$ ), whereas the average  $pH_i$  was

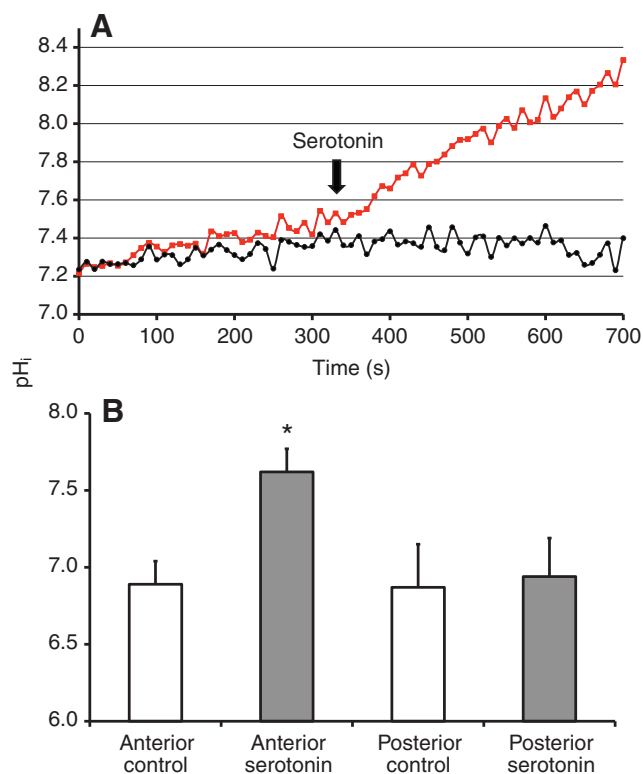

Fig. 2. Effects of serotonin on the  $pH_i$  in isolated and perfused anterior or posterior midguts. (A)  $pH_i$  time courses of representative areas of interest from the anterior (red) and posterior (black) midgut of larval (4th instar) *Aedes aegypti*, showing the influence of addition of  $0.2\text{ }\mu\text{mol l}^{-1}$  of serotonin (arrow) to the hemolymph-side bath. Hemolymph-side bath: oxygenated mosquito saline (pH 7). Luminal perfusate: NaCl ( $100\text{ mmol l}^{-1}$ , pH 7). (B) Average  $pH_i$  values for anterior ( $N=71$  areas of interest from 10 different tissues) and posterior ( $N=19$  areas of interest from four different tissues) midguts before and after addition of serotonin. Asterisk indicates statistically significant difference from control ( $P < 0.05$ ).

$6.87 \pm 0.28$  ( $N=4$ ) in 19 regions of four posterior stomach preparations.

Addition of serotonin ( $0.2\text{ }\mu\text{mol l}^{-1}$ ) led to a sustained increase in  $pH_i$  in the anterior midgut, from the control mean of  $6.89 \pm 0.15$  to  $7.62 \pm 0.15$  ( $N=10$ ;  $P < 0.05$ ). A representative time course of  $pH_i$  after serotonin is shown in Fig. 2. In many cases,  $pH_i$  values exceeded 8 – the maximal value recorded was 8.66. The time course of the  $pH_i$  rise was similar to that of the  $V_{te}$  response recorded in previous studies (Clark et al., 1999). In contrast, in the four experiments in which measurements were made simultaneously from the posterior midgut, either no significant changes or modest acidifications of  $pH_i$  were observed (see Fig. 2A,B). In the posterior regions  $pH_i$  before and after addition of serotonin was  $6.87 \pm 0.28$  and  $6.94 \pm 0.25$  ( $N=4$ ;  $P > 0.05$ ).

### $pH_i$ response to $pH_L 10.0$ in the presence and absence of luminal $Zn^{2+}$

In these experiments, the lumen was initially perfused with  $100\text{ mmol l}^{-1}$  NaCl buffered to pH 7.0. After the stability of the preparation was established, serotonin was added to the bath. Following the maximal effect of serotonin, the luminal perfusate was changed to pH 10.0 (buffered with  $10\text{ mmol l}^{-1}$  Tris; 'alkaline luminal perfusate') which would be more typical of physiological

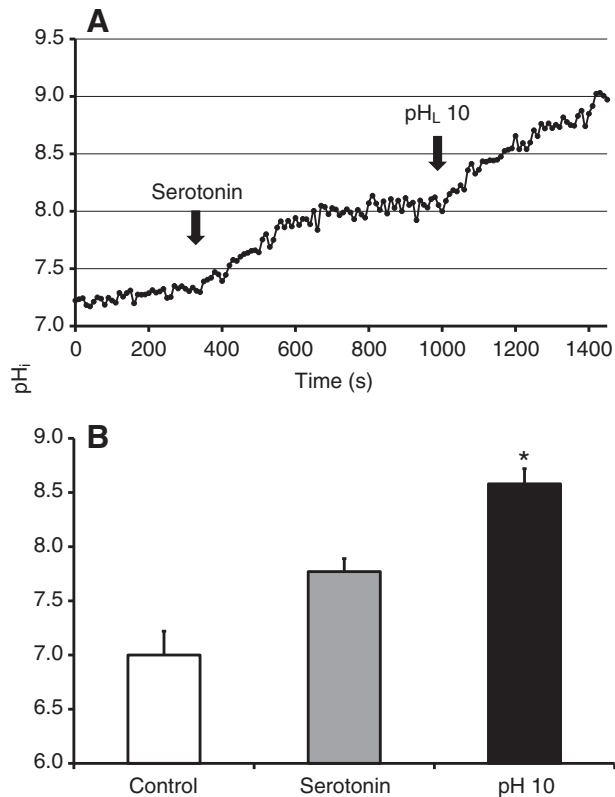

Fig. 3. Influence of luminal pH (pH<sub>L</sub>) 10 on pH<sub>i</sub> in the anterior midgut. (A) pH<sub>i</sub> time course of a representative area of interest from the anterior midgut of larval (4th instar) *Aedes aegypti*, showing the influence of hemolymph-side addition of serotonin (0.2 μmol l<sup>-1</sup>) in the presence of hemolymph-side mosquito saline (pH 7) and luminal NaCl (100 mmol l<sup>-1</sup>, pH 7), and the effect of an increase of the pH<sub>L</sub> to 10. (B) Average pH<sub>i</sub> for anterior midguts (N=41 areas of interest of four different tissues) under control conditions, after hemolymph-side addition of serotonin, and after switching to a luminal perfusate of pH 10. Asterisk indicates statistically significant difference from control plus serotonin ( $P < 0.05$ ).

conditions in an *in vivo* stimulated gut. A typical experiment is shown in Fig. 3A. For 41 areas from four tissues the mean pH<sub>i</sub> with serotonin was  $7.77 \pm 0.12$  (N=4) and significantly rose to  $8.58 \pm 0.14$  (N=4) with alkaline luminal perfusate ( $P < 0.05$ ; see Fig. 3B). The highest value recorded was 10.04. It is important to mention here that the pH dependence of the fluorescence excitation spectrum of BCECF-AM becomes non-linear above a pH of 8.6. Therefore, results above a pH value of 8.6 should be interpreted with caution as accurate calibrations are not possible. We can only interpret these results as being above a pH of 8.6. Unfortunately, there are no dyes available for accurate ratiometric pH imaging in the high pH range.

To test the potential involvement of inward-directed H<sup>+</sup> conductive channels in the alkalization of the lumen we performed three additional experiments where the luminal perfusate was pH 10 and 22 total areas of interest were monitored. ZnCl<sub>2</sub> (10 μmol l<sup>-1</sup>) was included in the alkaline luminal perfusate as a blocker of H<sup>+</sup> channels (DeCoursey, 2003). In these experiments, the mean control value with serotonin was  $7.11 \pm 0.19$  (N=3) and after a change to alkaline (pH 10) luminal perfusate in the presence of Zn<sup>2+</sup>, the mean pH<sub>i</sub> attained was  $8.18 \pm 0.19$  (N=3). The change in pH<sub>i</sub> in response to alkaline luminal perfusate in the presence of Zn<sup>2+</sup> was not significantly different from that recorded in the absence of Zn<sup>2+</sup> ( $P > 0.05$ ). Furthermore, the rate of increase of pH<sub>i</sub> after changing

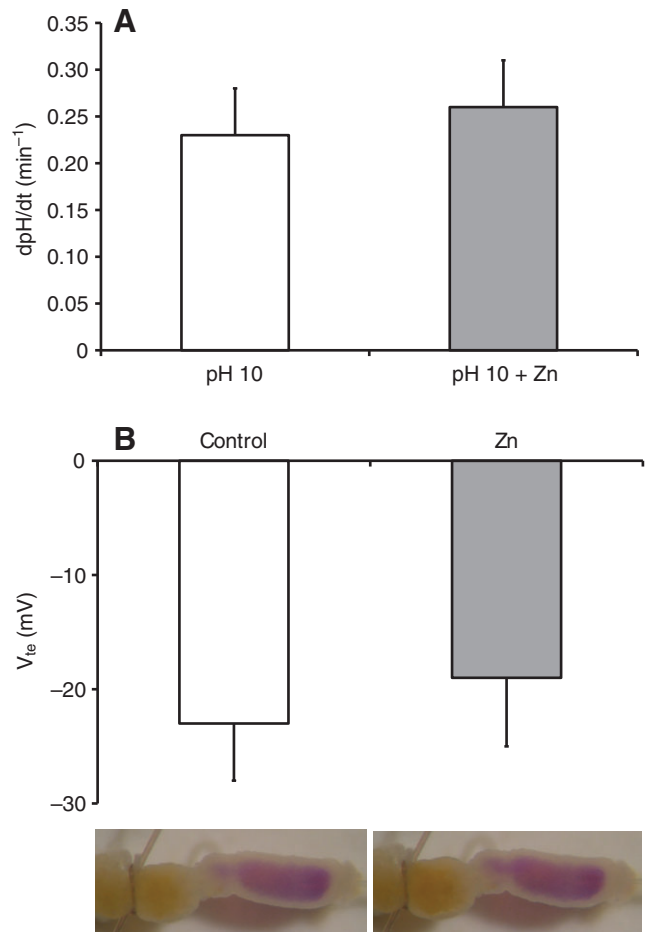

Fig. 4. Effects of luminal Zn<sup>2+</sup> on pH<sub>i</sub> at pH<sub>L</sub> 10, on the transepithelial voltage (V<sub>te</sub>), and on luminal alkalization. (A) Effect of luminal ZnCl<sub>2</sub> (10 μmol l<sup>-1</sup>) on the rate of pH<sub>i</sub> alkalization after switching to pH<sub>L</sub> 10 in the presence of serotonin (means + s.e.m.). Control: 41 areas of interest from four different tissues. In the presence of Zn<sup>2+</sup>: 22 areas of interest from three different tissues. (B) Average lumen-negative transepithelial voltage (V<sub>te</sub>, means - s.e.m.) of five isolated and perfused anterior midgut preparations of larval (4th instar) *Aedes aegypti* in the presence and absence of ZnCl<sub>2</sub> (10 μmol l<sup>-1</sup>), and photographs of a representative preparation of the anterior midgut of larval 4th instar *Aedes aegypti* at identical times after perfusion stop in the presence (right) and absence (left) of ZnCl<sub>2</sub> (10 μmol l<sup>-1</sup>).

to alkaline luminal perfusate was also not affected ( $P > 0.05$ ) by the presence of Zn<sup>2+</sup> (see Fig. 4A).

In parallel experiments, we measured V<sub>te</sub> at a pH<sub>L</sub> of 7 and compared the capability of the preparations for luminal alkalization using *m*-Cresol Purple in the absence and presence of luminal Zn<sup>2+</sup>. No significant effect of luminal Zn<sup>2+</sup> on V<sub>te</sub> ( $P > 0.05$ ) was detected and no difference in the capacity for luminal alkalization was observed. Fig. 4B shows a typical *m*-Cresol Purple response and the mean V<sub>te</sub> values in the presence and absence of Zn<sup>2+</sup> for five experiments.

#### Effects of alkaline luminal perfusate and spontaneous luminal alkalization on tissue electrical parameters

In a first series of experiments, cells of serotonin-stimulated tissues were penetrated as described in Materials and methods, and after an acceptable penetration was achieved, the luminal perfusate was

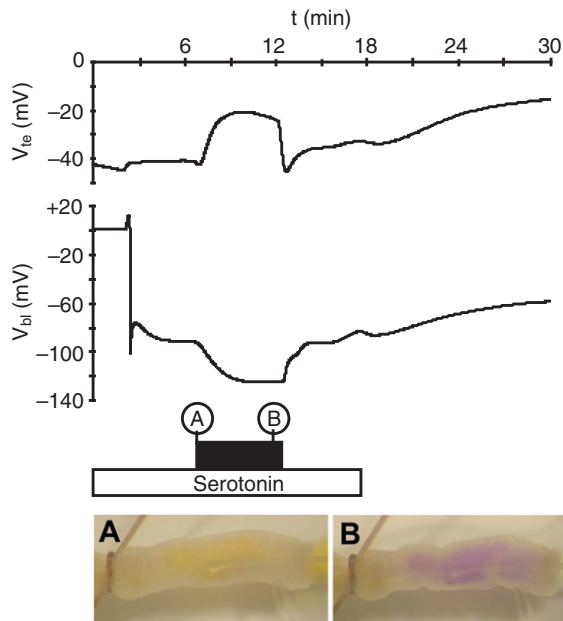

Fig. 5. Selected experiment with an isolated and perfused anterior midgut of larval (4th instar) *Aedes aegypti* showing the maximal changes of membrane voltages observed during spontaneous luminal alkalinization after luminal perfusion stop. After stabilization of  $V_{te}$  at  $-40$  mV (lumen negative), an epithelial cell in the anterior portion of the preparation was impaled with a microelectrode (see lower right in photographs A and B). Transbasal potential ( $V_{bi}$ ) stabilized at  $-90$  mV (cell negative). From these values the transapical voltage ( $V_{api}$ ) can be calculated to  $-50$  mV (cell negative). Five minutes after successful impalement a photograph of the preparation was taken (A, showing yellow perfusate of neutral pH) and the perfusion pump was stopped as indicated by the black bar. Within 3 min  $V_{te}$  dropped to  $-20$  mV, whereas  $V_{bi}$  hyperpolarized to over  $-120$  mV ( $V_{api}$  calculates under these conditions to  $-103$  mV), and the *m*-Cresol Purple indicated an alkaline midgut lumen (photo B). Restarting the luminal perfusion resulted in a return of the voltages to their original values. Subsequent washout of hemolymph-side serotonin reduced the lumen-negative  $V_{te}$  to  $-15$  mV and the membrane voltages  $V_{bi}$  and  $V_{api}$  decreased to  $-57$  mV and  $-42$  mV, respectively.

changed from pH 7.0 to pH 10.0. For 10 penetrations from five tissues the mean voltages at a  $pH_L$  of 7 were  $V_{te} = -8 \pm 3$  mV ( $N=5$ ; lumen negative),  $V_{bi} = -87 \pm 5$  mV ( $N=5$ ; cell negative) and  $V_{api} = -79 \pm 6$  mV ( $N=5$ ; cell negative). After the change to alkaline luminal perfusate the average voltages were  $V_{te} = -7 \pm 3$  mV ( $N=5$ ; lumen negative),  $V_{bi} = -94 \pm 6$  mV ( $N=5$ ; cell negative) and  $V_{api} = -87 \pm 6$  mV ( $N=5$ ; cell negative). The means of  $V_{te}$ ,  $V_{bi}$  and  $V_{api}$  before and after switching to pH 10 in the luminal perfusion are not significantly different ( $P > 0.05$ ).

In a number series of experiments, the luminal perfusate was unbuffered  $100 \text{ mmol l}^{-1}$  NaCl and perfusion was interrupted after an acceptable penetration was achieved, allowing measurement of possible electrical changes accompanying spontaneous luminal alkalinization (observed by the color change of luminal *m*-Cresol Purple). The results were similar to those reported for the alkaline luminal perfusion experiments above. For 12 penetrations from five tissues, the mean control values were  $V_{te} = -22 \pm 6$  mV ( $N=5$ ; lumen negative),  $V_{bi} = -94 \pm 9$  mV ( $N=5$ ; cell negative) and  $V_{api} = -72 \pm 10$  mV ( $N=5$ ; cell negative). The stable values recorded after perfusion stop were  $V_{te} = -19 \pm 4$  mV ( $N=5$ ; lumen negative),  $V_{bi} = -108 \pm 8$  mV ( $N=5$ ; cell negative) and  $V_{api} = -89 \pm 7$  mV ( $N=5$ ; cell negative). A typical

experiment is shown in Fig. 5. As for switching to pH 10 (see above), the means of  $V_{te}$ ,  $V_{bi}$  and  $V_{api}$  before and after luminal alkalinization by perfusion stop are not significantly different ( $P > 0.05$ ).

## DISCUSSION

### Methodological aspects

The magnitude of the apparent change in  $pH_i$  generated in the serotonin response appears to violate the principle of homeostasis of the intracellular milieu, and a careful consideration of its veracity is in order. In principle, the fluorescence changes reported here could arise as an artifact, in the absence of an actual general cytoplasmic pH change, in two ways. First, the BCECF indicator dye might have become concentrated in an intracellular sub-compartment which then became extremely alkaline as an effect of serotonin, or second, the dye might be secreted or simply leak out of the cells, and accumulate in an extracellular region that became alkaline as a result of the effect of serotonin. However, neither of these possibilities seems tenable. In either case, the dye compartment giving rise to the artifact would have to represent a significant fraction of the total dye contributing to the optical signal. In our preliminary studies conducted at high magnification, no brightly fluorescing intracellular entities were noted in the dye-loaded tissue, although some individual cells appeared to load dye more readily than others. Additionally, the intercellular spaces were not seen to fluoresce brightly in comparison with the cellular interiors, suggesting that alkaline compartments in the cell would not contribute to the observed alkalinization of  $pH_i$ . In the second case, accumulation of the dye in the luminal solution would presumably not be a source of optical signal, especially during continuous luminal perfusion. Moreover, experiments where we stopped and restarted perfusion were never accompanied by a change in fluorescence intensity, suggesting that, if dye were transported to the gut lumen, it did not result in any significant signal relative to the cytoplasmic pool of BCECF. The epithelial cells in the anterior midgut do not have a brush border. Only relatively sparse and short microvilli were observed (Clark et al., 2005). Consequently, entrapment of dye in an extracellular space formed by a thick brush border can be excluded.

Another significant aspect that requires consideration is that BCECF fluorescence approaches maximum intensity at pH values above pH 8.6 and extremely alkaline  $pH_i$  values should be interpreted with caution. In our experiments, this resulted in a very cautious interpretation of  $pH_i$  in the cytoplasm of serotonin-stimulated cells, especially during high luminal pH perfusion. The development of pH-sensitive indicators with an alkaline  $pK$  is necessary for accurate assessment of  $pH_i$  in this unique tissue.

### Extremely alkaline $pH_i$ in larval mosquito midgut cells

In the absence of serotonin the  $pH_i$  of anterior and posterior midgut cells is neutral to slightly acidic, as has been observed in many other tissues. In the anterior midgut, addition of serotonin results in a significant alkalinization of the intracellular medium, whereas the posterior midgut cells do not respond to serotonin with a  $pH_i$  change (see Fig. 2A,B). Consequently, the increase of  $pH_i$  seems to be a specific response of the cells responsible for luminal alkalinization. Under more *in vivo*-like conditions, namely in the presence of an alkaline lumen, the  $pH_i$  was observed to be between 8 and 9. To our knowledge  $pH_i$  values of this magnitude have never been observed before. At first sight this seems surprising given the dogma of the necessity for  $pH_i$  to be highly regulated for proper metabolic function. However, this epithelial tissue is unique in that it is responsible for generating an extremely alkaline secretion and an

alkaline intracellular medium is likely to be of mechanistic importance. If the cells have a conventional  $\text{pH}_i$  of about 7, the whole transepithelial pH gradient of over 3 orders of magnitude would be carried by only the apical membrane that faces the extremely alkaline midgut lumen. By generating (and tolerating) a very alkaline intracellular medium the transepithelial pH gradient is separated into two smaller steps at the basolateral and apical membranes. Knowing that basolateral V-type  $\text{H}^+$ -ATPases are activated by serotonin and are a necessary component of luminal alkalization (Onken et al., 2008), we can assume that activation of the basolateral V-ATPases is responsible for generating the pH gradient across the basolateral membrane.

#### Proton-motive forces across the basolateral and apical membranes

From our measurements of  $\text{pH}_i$  and transmembrane voltages we can calculate the independent proton-motive forces for the basolateral and apical membranes in the presence of serotonin for two different conditions: (i) at a  $\text{pH}_L$  of 7, and (ii) at a more *in vivo*-like  $\text{pH}_L$  of 10 (see Fig. 6). At a neutral pH on both sides of the epithelium, proton-motive forces of above 100 mV dominate both membranes, favoring passive  $\text{H}^+$  movements from the extracellular solutions into the cell. In the presence of an alkaline lumen, the transbasal proton-motive force is huge, almost 190 mV, whereas the proton-motive force of the apical membrane is very small. The reversal potential of the V-ATPase, as estimated in various insect systems, is of the order of 120–180 mV (Beyenbach et al., 2000; Moffett, 1980; Moffett and Koch, 1988; Pannabecker et al., 1992). Thus, the proton-motive force across the basolateral membrane can be explained on the basis of  $\text{H}^+$  pumping by V-ATPases in this membrane. Of course, it is informative to analyze how the tissue can move from one state to the other, generating an alkaline  $\text{pH}_L$ . A controlled opening of a conductive pathway for  $\text{H}^+$  in the apical membrane could make use of the transapical proton-motive force at neutral pH for transapical  $\text{H}^+$  absorption until  $\text{H}^+$  is in equilibrium at a very alkaline midgut lumen. Whilst the present study addressed the conductive pathway in the apical membrane (see below), one question that needs to be addressed in future studies is what determines the transapical voltage under control conditions that is responsible for the high driving force for  $\text{H}^+$  at neutral pH in the lumen.

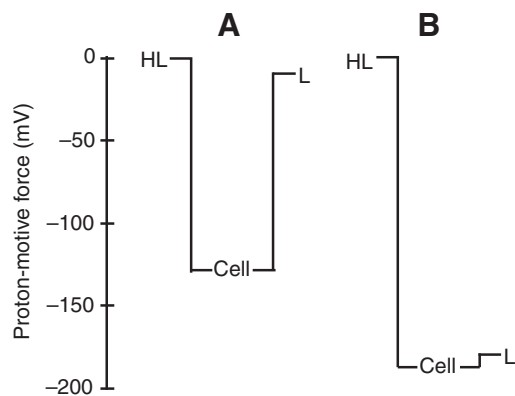

Fig. 6. Transepithelial profiles of the proton-motive force (in mV) calculated from the average membrane voltages and transmembrane pH gradients (A) for a control condition with mosquito saline containing serotonin as the hemolymph-side bath ( $\text{pH}$  7) and luminal perfusion with  $\text{NaCl}$  ( $100 \text{ mmol l}^{-1}$ ,  $\text{pH}$  7), and (B) after increasing the  $\text{pH}$  of the luminal perfusate to 10. HL, hemolymph; L, lumen.

#### Implications of the results for the mechanism of strong midgut alkalization

It seems to be well established that basolateral V-ATPase is driving transbasal  $\text{H}^+$  absorption and the overall transepithelial acid/base transport. Boudko and colleagues (Boudko et al., 2001a) analyzed anionic pathways in the apical membrane and proposed that apical  $\text{Cl}^-/\text{HCO}_3^-$  exchange acts to alkalize the anterior midgut lumen. However, in the isolated tissue, neither DIDS nor  $\text{Cl}^-$ -free salines affected the capacity of the tissue for strong luminal alkalization (Onken et al., 2008). Based on immunohistochemical observations, Okech and colleagues (Okech et al., 2008) proposed the presence of acid absorption *via* electrogenic cation/ $2\text{H}^+$  exchangers in the apical membrane. Indeed, the present studies show that there would be a driving force of approximately 100 mV, which is sufficient for a  $2\text{H}^+/\text{Na}^+$  exchanger (see below). However, in previous experiments (Onken et al., 2008) luminal amiloride did not inhibit luminal alkalization. Of course, if the transporter mediated  $\text{K}^+/\text{H}^+$  exchange, the driving forces would be favorable for both ions. However, in the same study, Onken and colleagues found that an increased luminal  $\text{K}^+$  concentration, reducing the driving force for the exchange, also did not impair luminal alkalization. Therefore, in the present study we addressed the possibility of transapical absorption of  $\text{H}^+$  through  $\text{H}^+$  channels. The theory is that the cell would excrete  $\text{HCO}_3^-$  followed by dissociation in the lumen and apical resorption *via* an apical  $\text{H}^+$  channel. However, micromolar  $\text{Zn}^{2+}$ , used at concentrations known to block different  $\text{H}^+$  conductances (see DeCoursey, 2003) did not significantly affect the  $\text{pH}_i$  change or the transepithelial voltage (see Fig. 4A,B). Moreover, the presence of luminal  $\text{Zn}^{2+}$  did not prevent luminal alkalization (see Fig. 4B). We recognize that negative results in pharmacological approaches are not necessarily conclusive. However, it could be expected that in the presence of  $\text{H}^+$  channels a membrane would respond with significant voltage changes to alterations of the transmembrane pH gradient. As we did not observe such changes in our microelectrode experiments (see Results and Fig. 5), this suggests that apical  $\text{H}^+$  channels have no importance for  $\text{H}^+$  absorption and strong alkalization in this tissue.

Carbonic anhydrase (CA) is apparently not present in the cells of the anterior midgut of *Aedes aegypti* (Corena et al., 2002) and inhibitors of this enzyme were not effective at impeding luminal alkalization *in vitro* (Onken et al., 2008). After finding the considerably alkaline  $\text{pH}_i$ , the absence of cellular CA is less surprising, because high pH values should accelerate the hydration of  $\text{CO}_2$  and the dissociation of carbonic acid, reducing the usefulness of cellular CA. Smith and colleagues (Smith et al., 2007) have observed extracellular CA in the ectoperitrophic space of larval malaria mosquitoes (*Anopheles gambiae*), and this suggests that extracellular conversion of  $\text{CO}_2$  to  $\text{HCO}_3^-/\text{CO}_3^{2-}$  and absorption of protons is involved in luminal alkalization in this species. However, an extracellular CA has not been found in *Aedes aegypti*, and in our hands the addition of inhibitors of CA to the holding water did not prevent the living larvae from alkalizing their anterior midguts (U. Jagadeshwaran and D.F.M., unpublished observation). If secretion of either  $\text{HCO}_3^-$  or  $\text{CO}_3^{2-}$  turns out to be an important component of luminal alkalization, the source of this  $\text{HCO}_3^-/\text{CO}_3^{2-}$  must be addressed in future studies. Instead of respiratory  $\text{CO}_2$  from carbohydrate or lipid catabolism,  $\text{HCO}_3^-$  from amino acid catabolism is also a candidate that must be addressed in the absence of measurable CA activity (see Fry and Karet, 2007). The latter hypothesis is especially attractive, because amino acid catabolism also produces ammonia, which has been found at high concentrations in the mosquito hemolymph (Edwards, 1982b).

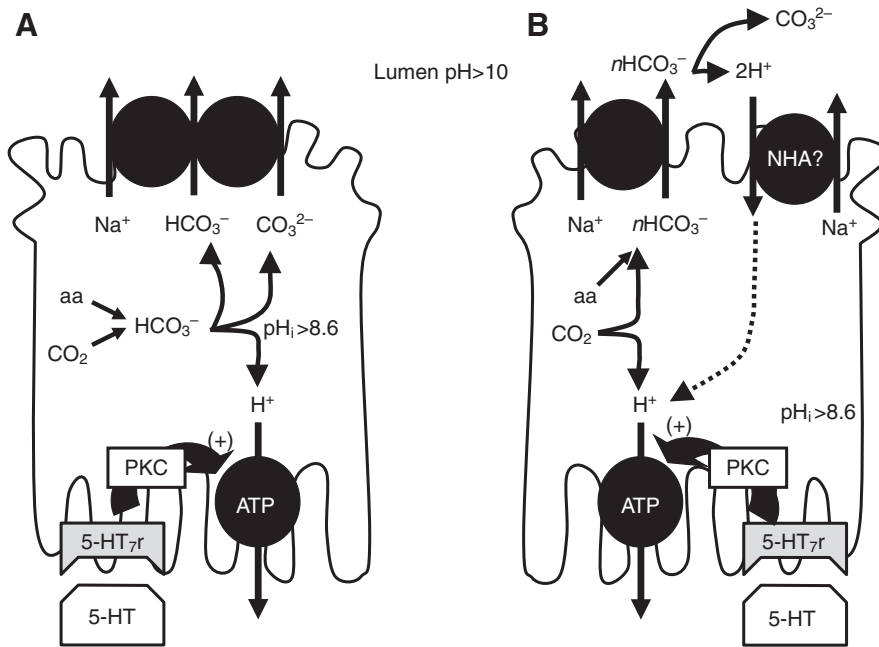

Fig. 7. Potential modes of transport in the anterior midgut of the mosquito *Aedes aegypti* to achieve luminal alkalinization. (A) Alkalinization of the lumen is achieved *via* an apical  $\text{Na}^+/\text{CO}_3^{2-}$  co-transporter of unknown stoichiometry. This process is initiated by 5-HT stimulation of basolateral  $\text{H}^+$ -ATPase pumping and an unusually high pH<sub>i</sub>.  $\text{CO}_3^{2-}$  is proposed to be derived from either amino acid (aa) catabolism or  $\text{CO}_2$  hydration and subsequent  $\text{H}^+$  removal. (B) In this model, luminal alkalinization is achieved by the coordinated action of an apical electrogenic  $\text{Na}^+/\text{HCO}_3^-$  co-transporter of unknown stoichiometry ( $n$ ) and an apical electrogenic  $\text{Na}^+/\text{H}^+$  antiporter (NHA). Upon secretion into the lumen,  $\text{HCO}_3^-$  is converted to  $\text{CO}_3^{2-}$  and  $\text{H}^+$  and the  $\text{H}^+$  is re-absorbed into the cell *via* a NHA and then pumped across the basolateral membrane by the action of a basolateral  $\text{H}^+$  ATPase. The other components of the model are the same as described for part A of this figure. PKC, protein kinase C; 5-HT<sub>7r</sub>, 5-HT<sub>7</sub> receptor.

#### Implications of the results for future studies

In a previous study of strong alkalinization in isolated and perfused midgut preparations (Onken et al., 2008) we could not find experimental support for the anionic (DIDS-sensitive  $\text{Cl}^-/\text{HCO}_3^-$  exchange) or cationic (amiloride-sensitive cation/ $\text{H}^+$  exchange) pathways in the apical membrane that had been proposed on the basis of results obtained with intact or semi-intact larvae (Boudko et al., 2001a; Okech et al., 2008). Future studies with isolated tissues should consider that both pathways may be present but equally potent in terms of generating strong luminal alkalinization. Thus, experiments that impede both mechanisms at the same time should be conducted.

The results presented herein suggested that perhaps a novel mechanism for alkalinization of the lumen is present in this tissue. In Fig. 7 we show two possible models for net alkali secretion that could be present in the anterior midgut of the larval mosquito. Our results cannot differentiate between these two possibilities and we will discuss each of these potential models separately.

In the first model, the main novel aspect is the proposal for direct  $\text{CO}_3^{2-}$  secretion either *via* an apical  $\text{Na}^+/\text{CO}_3^{2-}$  co-transporter (NBC) or *via* a novel  $\text{Na}^+/\text{HCO}_3^-/\text{CO}_3^{2-}$  co-transporter (NBCC) operating in export mode. To our knowledge, there are no other reports of an NBC functioning in this particular mode (NBCC) simply because of the relative paucity of intracellular  $\text{CO}_3^{2-}$  present in the cells. We have only represented NBCC in the proposed model for clarity (Fig. 7A). It is extremely important to consider that fundamental thermodynamic principles support the possibility that our models can operate in the stimulated tissues (Parks et al., 2008). It would be highly advantageous for the tissue to directly secrete  $\text{CO}_3^{2-}$  as this would negate the requirement for potentially deleterious  $\text{H}^+$  import mechanisms. The following equation describes the equilibrium point for the net driving forces for a novel electrogenic NBCC as a function of the intracellular and extracellular concentrations  $\text{CO}_3^{2-}$ ,  $\text{HCO}_3^-$  and  $\text{Na}^+$ :

$$\mu_m = FV_m + RT \ln([\text{Na}^+]_i / [\text{Na}^+]_L) + FV_m + RT \ln([\text{HCO}_3^-]_i / [\text{HCO}_3^-]_L) + 2FV_m + 2RT \ln([\text{CO}_3^{2-}]_i / [\text{CO}_3^{2-}]_L), \quad (1)$$

where  $\mu_m$  is net driving force,  $V_m$  is membrane potential,  $R$  is the universal gas constant,  $T$  is temperature and  $F$  is Faraday's constant.

We know the measured total  $\text{CO}_2$  in the lumen under stimulated conditions to be  $58 \text{ mmol l}^{-1}$  and the measured intracellular total  $\text{CO}_2$  to be  $\sim 50 \text{ mmol l}^{-1}$  (Boudko et al., 2001a). As we know the pK of the reaction  $\text{HCO}_3^- \rightarrow \text{CO}_3^{2-} + \text{H}^+$  is 10.3, we can therefore set the pH of the luminal solution at pH 10.3 and assume the composition of the luminal fluid to be in equilibrium at  $29 \text{ mmol l}^{-1} \text{ CO}_3^{2-}$  and  $29 \text{ mmol l}^{-1} \text{ HCO}_3^-$ . A reasonable estimate for  $[\text{Na}^+]_i$  is  $10 \text{ mmol l}^{-1}$  and the luminal  $[\text{Na}^+]$  in our perfusate is  $100 \text{ mmol l}^{-1}$ . Additionally, we have measured the  $V_{\text{api}}$  to be approximately  $-90 \text{ mV}$ . Rearranging the above equation and solving for the intracellular carbonate levels required to drive the transport yields the following equation:

$$[\text{CO}_3^{2-}]_i = [\text{CO}_3^{2-}]_o \sqrt{([\text{Na}^+]_L / [\text{Na}^+]_i)} \sqrt{([\text{HCO}_3^-]_L / [\text{HCO}_3^-]_i)} e^{[FV_m/RT]}. \quad (2)$$

At a resting pH<sub>i</sub> of 7.0 (measured in this experiment) and a measured total  $[\text{CO}_2]_i$  of  $50.1 \text{ mmol l}^{-1}$  (Boudko et al., 2001a), we can calculate the relative amounts of  $\text{CO}_3^{2-}$  present using the Henderson-Hasselbalch equation. There would only be nominal amounts ( $\sim 25 \mu\text{mol l}^{-1}$ ) of carbonate ( $\text{CO}_3^{2-}$ ) present inside the cells at the resting pH<sub>i</sub>. These concentrations would be completely insufficient to allow uphill transport of  $\text{CO}_3^{2-}$  into the solution present in the lumen. In fact, it would require an apical membrane potential of approximately  $-204 \text{ mV}$  to drive this transport. However, at a pH<sub>i</sub> of 8.6, the estimated  $[\text{CO}_3^{2-}]_i$  would be  $\sim 1 \text{ mmol l}^{-1}$ ; at pH<sub>i</sub> 8.8, it would be  $1.6 \text{ mmol l}^{-1}$ ; while for pH<sub>i</sub> 9, the estimated  $[\text{CO}_3^{2-}]_i$  would be  $\sim 2.5 \text{ mmol l}^{-1}$ . It is important to note that  $[\text{CO}_3^{2-}]_i$  relative to overall measured total  $[\text{CO}_2]$  will rise steeply as pH<sub>i</sub> rises closer to its pK of 10.3.

Substituting the measured concentrations of ions into the equation above will yield the required  $[\text{CO}_3^{2-}]_i$  at the known membrane potential ( $-90 \text{ mV}$ ) to allow transport of  $\text{CO}_3^{2-}$  out of the cell. At the measured value of  $-90 \text{ mV}$ , a  $[\text{CO}_3^{2-}]_i$  of  $2.03 \text{ mmol l}^{-1}$  would be required to drive transport out *via* a putative NBCC. This value could be achieved at a pH<sub>i</sub> of 8.9, which is approximately within the range of pH<sub>i</sub> in our experiments given the significant limitations placed on us by the dye (see above). At a slightly more hyperpolarized  $V_{\text{api}}$  of  $-100 \text{ mV}$ , the required  $[\text{CO}_3^{2-}]_i$  would fall to  $1.45 \text{ mmol l}^{-1}$ , or the value reached at pH<sub>i</sub> 8.77. Clearly, at these

Table 1. Maximum pH<sub>L</sub> attainable as a function of intracellular pH using an apical electrogenic NBC coupled to a NHA

| pH <sub>i</sub> | Maximum pH <sub>L</sub> attainable |
|-----------------|------------------------------------|
| 7.0             | 9.02                               |
| 7.5             | 9.52                               |
| 8.0             | 10.02                              |
| 8.5             | 10.52                              |
| 9.0             | 11.02                              |

The maximum pH<sub>L</sub> attainable refers to the pH in the lumen that could still theoretically allow an electrogenic Na<sup>+</sup>/H<sup>+</sup> antiporter (NHA) to function in bringing H<sup>+</sup> into the cell from the lumen. These calculated values assume [Na<sup>+</sup>]<sub>i</sub>=10 mmol l<sup>-1</sup>, luminal [Na<sup>+</sup>]=100 mmol l<sup>-1</sup>, and V<sub>api</sub>=-90 mV. NBC, Na<sup>+</sup>/HCO<sub>3</sub><sup>-</sup> co-transporter.

higher pH<sub>i</sub> values as measured, the [CO<sub>3</sub><sup>2-</sup>]<sub>i</sub> should become sufficient for direct CO<sub>3</sub><sup>2-</sup> transport *via* a NBCC. Moreover, this clearly illuminates the need for an elevation of pH<sub>i</sub> to aid in luminal alkalization.

In the second model of secretion (see Fig. 7B), we suggest that the bulk of the base could be secreted as HCO<sub>3</sub><sup>-</sup> *via* an apical Na<sup>+</sup>/HCO<sub>3</sub><sup>-</sup> co-transporter (NBC) working in export mode followed by net acid absorption *via* a cation/H<sup>+</sup> exchanger (see Fig. 7B). Such a mechanism has been proposed by Okech and colleagues (Okech et al., 2008) for the mosquito midgut; this was first envisaged (Dow, 1984) for the midgut of lepidopteran insect larvae, which achieve similarly alkaline pH<sub>L</sub> values.

Direct evidence for an electrogenic Na<sup>+</sup>/H<sup>+</sup> antiporter (NHA) is lacking in our studies; furthermore, a NHA localized in the anterior midgut of *Anopheles gambiae* apparently is not expressed in the plasma membrane (Rheault et al., 2007). We performed a thermodynamic analysis to determine whether in fact it could function under the conditions found in the anterior midgut and whether the noted intracellular alkalization would favor the operation of this combined mechanism. The following equation describes the equilibrium point for the net driving forces for an electrogenic NHA as a function of the pH<sub>L</sub> and the membrane potential:

$$[H^+]_L = [H^+]_i \sqrt{([Na^+]_i / [Na^+]_L) e^{(zFV_m/R)}} \quad (3)$$

Substitution of known parameters allows us to solve for the maximum pH<sub>L</sub> that can be generated to still enable the proper functioning of a NHA with varying pH<sub>i</sub>. The results shown in Table 1 demonstrate that an increase in pH<sub>i</sub> directly favors higher pH<sub>L</sub> values *via* the action of an apical NHA. At a pH<sub>i</sub> of 7.0, the maximum pH<sub>L</sub> that can be generated would only be pH 9.0. However, a pH<sub>i</sub> of 8.5 would allow for a pH<sub>L</sub> of 10.52, which falls within measured values for both *in vivo* and *in vitro* studies of these parameters and demonstrates the necessity for intracellular alkalization to achieve the high pH<sub>L</sub> values. As mentioned above we are limited in our ability to accurately measure pH<sub>i</sub> above 8.6. However, in many traces, the noted fluorescence intensity was far above the highest calibration values, suggesting that the pH<sub>i</sub> of the anterior midgut does indeed reach levels far greater than 8.6. These extreme pH<sub>i</sub> values would allow an even greater alkaline pH<sub>L</sub> to exist.

An important task for the future is to identify and characterize those transporters that are responsible for the transapical voltage, because this is a significant component of the transapical proton-motive force (see above). Finally, our finding of an extremely high pH<sub>i</sub> raises numerous questions about the challenges that this condition would place on other metabolic functions in this unique tissue and these questions will form the basis of future study.

## LIST OF ABBREVIATIONS

|                  |                                                                                              |
|------------------|----------------------------------------------------------------------------------------------|
| NBC              | Na <sup>+</sup> /CO <sub>3</sub> <sup>2-</sup> co-transporter                                |
| NBCC             | Na <sup>+</sup> /HCO <sub>3</sub> <sup>-</sup> /CO <sub>3</sub> <sup>2-</sup> co-transporter |
| NHA              | Na <sup>+</sup> /H <sup>+</sup> antiporter                                                   |
| pH <sub>i</sub>  | intracellular pH                                                                             |
| pH <sub>L</sub>  | luminal pH                                                                                   |
| V <sub>api</sub> | transapical potential                                                                        |
| V <sub>bl</sub>  | transbasal potential                                                                         |
| V <sub>m</sub>   | membrane potential                                                                           |
| V <sub>te</sub>  | transepithelial potential                                                                    |

This research was supported by the National Institutes of Health (RO1-AI06346301). S.K.P. is funded by a Canada Graduate Scholarship (CGSD) from the Natural Sciences and Engineering Research Council of Canada (NSERC) and an Honorary Izaak Walton Killam Memorial Scholarship. G.G.G. is supported by an NSERC Discovery grant. Deposited in PMC for release after 12 months.

## REFERENCES

- Beyenbach, K. W., Pannabecker, T. L. and Nagel, W. (2000). Central role of the apical membrane H<sup>+</sup>-ATPase in electrogenesis and epithelial transport in Malpighian tubules. *J. Exp. Biol.* **203**, 1459-1468.
- Boudko, D. Y., Moroz, L. L., Harvey, W. R. and Linser, P. J. (2001a). Alkalinization by chloride/bicarbonate pathway in larval mosquito midgut. *Proc. Natl. Acad. Sci. USA* **98**, 15354-15359.
- Boudko, D. Y., Moroz, L. L., Linser, P. J., Trimarchi, J. R., Smith, P. J. S. and Harvey, W. R. (2001b). *In situ* analysis of pH gradients in mosquito larvae using non-invasive, self-referencing, pH-sensitive microelectrodes. *J. Exp. Biol.* **204**, 691-699.
- Clark, T. M., Koch, A. and Moffett, D. F. (1999). The anterior and posterior 'stomach' regions of larval *Aedes aegypti* midgut: regional specialization of ion transport and stimulation by 5-hydroxytryptamine. *J. Exp. Biol.* **202**, 247-252.
- Clark, T. M., Koch, A. and Moffett, D. F. (2000). The electrical properties of the anterior stomach of the larval mosquito (*Aedes aegypti*). *J. Exp. Biol.* **203**, 1093-1101.
- Clark, T. M., Hutchinson, M. J., Heugel, K. L., Moffett, S. B. and Moffett, D. F. (2005). Additional morphological and physiological heterogeneity within the midgut of larval *Aedes aegypti* (Diptera: Culicidae) revealed by histology, electrophysiology and effects of *Bacillus thuringiensis* endotoxin. *Tissue Cell* **37**, 457-468.
- Corena, D. P. M., Seron, T. J., Lehman, H. K., Ochrietor, J. D., Kohn, A., Tu, C. and Linser, P. J. (2002). Carbonic anhydrase in the midgut of larval *Aedes aegypti*: cloning, localization and inhibition. *J. Exp. Biol.* **205**, 591-602.
- Dadd, R. H. (1975). Alkalinity within the midgut of mosquito larvae with alkaline-active digestive enzymes. *J. Insect Physiol.* **21**, 1847-1853.
- DeCoursey, T. H. (2003). Voltage-gated proton channels and other proton transfer pathways. *Physiol. Rev.* **83**, 475-579.
- Dow, J. A. T. (1984). Extremely high pH in biological systems: a model for carbonate transport. *Am. J. Physiol.* **246**, R633-R635.
- Edwards, H. A. (1982a). Ion concentration and activity in the haemolymph of *Aedes aegypti* larvae. *J. Exp. Biol.* **101**, 143-151.
- Edwards, H. A. (1982b). Free amino acids as regulators of osmotic pressure in aquatic insect larvae. *J. Exp. Biol.* **101**, 153-160.
- Fry, A. C. and Karet, F. E. (2007). Inherited renal acidoses. *Physiology* **22**, 202-211.
- Moffett, D. F. (1980). Voltage-current relation and K<sup>+</sup> transport in tobacco hornworm (*Manduca sexta*) midgut. *J. Membr. Biol.* **54**, 213-219.
- Moffett, D. F. and Koch, A. R. (1988). Electrophysiology of K<sup>+</sup> transport by midgut epithelium of lepidopteran insect larvae. II. The transapical electrochemical gradients. *J. Exp. Biol.* **135**, 39-49.
- Moffett, S. B. and Moffett, D. F. (2005). Comparison of immunoreactivity to serotonin, FMRFamide and SCP<sub>6</sub> in the gut and visceral nervous system of larvae, pupae and adults of the yellow fever mosquito *Aedes aegypti*. *J. Insect Sci.* **5**, 20.
- Okech, B. A., Boudko, D. Y., Linser, P. J. and Harvey, W. R. (2008). Cationic pathway of pH regulation in larvae of *Anopheles gambiae*. *J. Exp. Biol.* **211**, 957-968.
- Onken, H., Moffett, S. B. and Moffett, D. F. (2004). The anterior stomach of larval mosquitoes (*Aedes aegypti*): effects of neuropeptides on transepithelial ion transport and muscular motility. *J. Exp. Biol.* **207**, 3731-3739.
- Onken, H., Moffett, S. B. and Moffett, D. F. (2008). Alkalinization in the isolated and perfused anterior midgut of the larval mosquito, *Aedes aegypti*. *J. Insect Sci.* **8**, 43.
- Pannabecker, T. L., Aneshansley, D. J. and Beyenbach, K. W. (1992). Unique electrophysiological effects of dinitrophenol in Malpighian tubules. *Am. J. Physiol.* **263**, R609-R614.
- Parks, S. K., Tresguerres, M. and Goss, G. G. (2007). Interactions between Na<sup>+</sup> channels and Na<sup>+</sup>/HCO<sub>3</sub><sup>-</sup> cotransporters in the freshwater fish gill: a model for transepithelial Na<sup>+</sup> uptake. *Am. J. Physiol. Cell Physiol.* **292**, 935-944.
- Parks, S. K., Tresguerres, M. and Goss, G. G. (2008). Theoretical considerations underlying Na<sup>+</sup> uptake mechanisms in freshwater fishes. *Comp. Biochem. Physiol. C* **148**, 411-418.
- Rheault, M. R., Okech, B. A., Keen, S. B. W., Miller, M. M., Meleshkevitch, E. A., Linser, P. J., Boudko, D. Y. and Harvey, W. R. (2007). Molecular cloning, phylogeny and localization of AgNHA1: the first Na<sup>+</sup>/H<sup>+</sup> antiporter (NHA) from a metazoan, *Anopheles gambiae*. *J. Exp. Biol.* **210**, 3848-3861.
- Smith, K. E., VanEkeris, L. A. and Linser, P. J. (2007). Cloning and characterization of AgCA9, a novel α-carbonic anhydrase from *Anopheles gambiae* Giles *sensu stricto* (Diptera: Culicidae) larvae. *J. Exp. Biol.* **210**, 3919-3930.
- Zhuang, Z., Linser, P. J. and Harvey, W. R. (1999). Antibody to H<sup>+</sup> V-ATPase subunit E colocalizes with portosomes in alkaline larval midgut of a freshwater mosquito (*Aedes aegypti*). *J. Exp. Biol.* **202**, 2449-2460.
